# Supplementary material
Source: Springer Nature journal article supplement (https://www.springermedizin.de/resource/supplementary/13058_2011_2956_MOESM6_ESM.pdf/9702856)

**A.**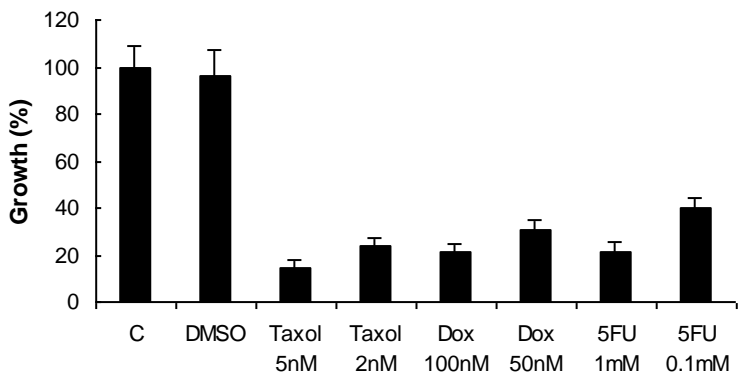**B.**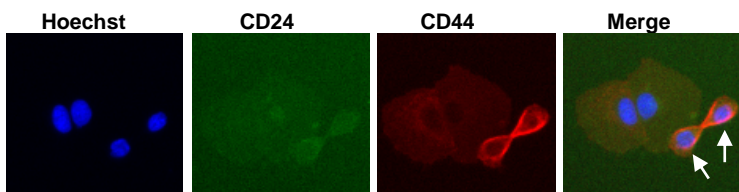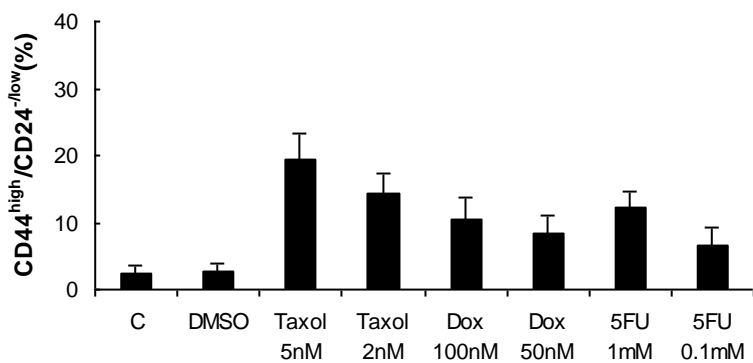**C.**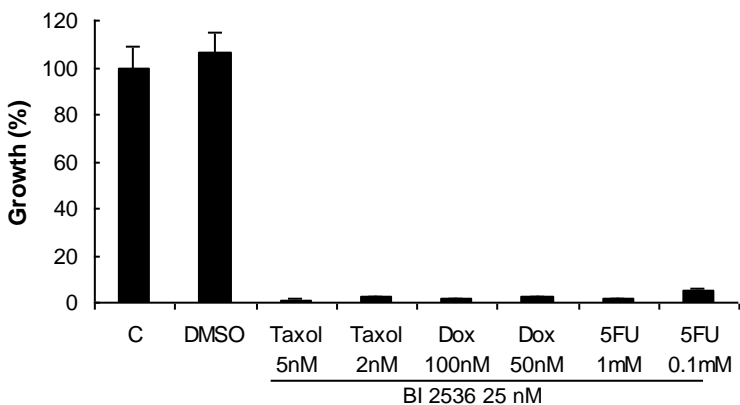

Supplement: MOESM6 [file 9702856]
